# Supplementary material for: Properties of metal species in square-shape mesopores of KSW-2-based silica
Source: Royal Society of Chemistry journal article supplement (doi:10.1039/b821451d), 2009-01-01
Supplement: b821451d.pdf [file b821451d.pdf]

## Supporting Information

### Properties of Metal Species in Square-Shape Mesopores of KSW-2-Based Silica

Tatsuo Kimura,\* Shengjum Huang, Atsushi Fukuoka, and Kazuyuki Kuroda

#### Silylation of as-synthesized KSW-2 with $C_8C_1SiCl_2$

As-synthesized KSW-2, in which  $C_{16}TMA$  ions were contained, was directly modified with  $C_8C_1SiCl_2$  to stabilize the molecular ordering originating from kanemite, according to the previous paper.<sup>15</sup> In the XRD pattern of as-synthesized KSW-2, the peaks with the  $d$ -spacings of 4.1, 3.0, and 2.0 nm are assignable to (11), (20), and (22) peaks due to a 2-D orthorhombic mesostructure ( $c2mm$ ), respectively (Fig. S1a). The TEM images of as-synthesized KSW-2 also support the formation of 1-D square-shape mesopores (Fig. S2). The peak with the  $d$ -spacing of 0.36 nm is associated with the presence of a molecular ordering due to the framework of kanemite, as proved by the detailed TEM observation reported previously.<sup>16</sup> The XRD peaks were retained after silylation with  $C_8C_1SiCl_2$ , but slightly broadened (Fig. S1b), being related to the presence of a new molecular ordering accumulated from the kanemite-based silicate framework. The peak with the  $d$ -spacing of 0.36 nm was hardly observed after calcination of the silylated product (Fig. S1c). The peaks due to  $Q^n$  ( $n = 2-4$ ) species were well resolved in the  $^{29}Si$  MAS NMR spectrum of the calcined product (Fig. S3c), suggesting that the environment of  $SiO_4$  species in the framework was relatively identical, as well as those in the frameworks of as-synthesized KSW-2 and the silylated product (Figs. S3a and b). In addition, the width of the  $Q^n$  peaks was narrower than those observed for calcined KSW-2 without silylation (Fig. S4). The  $Q^3$  species in as-synthesized KSW-2 are mostly considered as  $SiO_4$  species in the original molecular ordering and reacted with  $C_8C_1SiCl_2$ , and then the amount of  $Q^4$  species are increased by the addition of  $D^n$  ( $n = 1, 2$ ) units by silylation ( $D^n/Q^n = 0.31$ ). Finally,  $Q^n$  ( $n = 2-4$ ) species are reformed by calcination of the silylated product to remove all the organic groups.

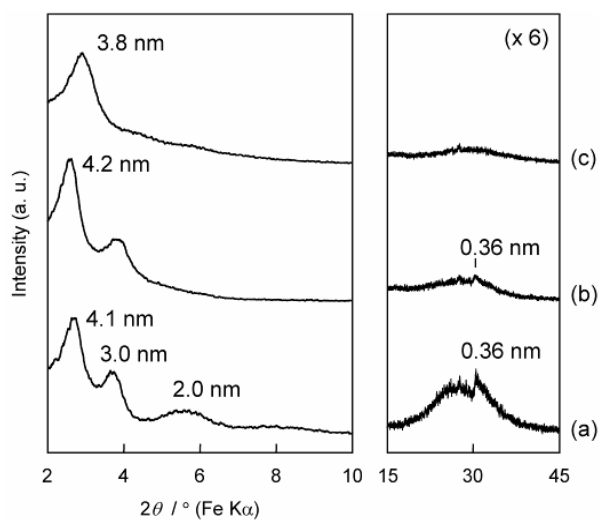

**Supporting Fig S1.** XRD patterns of (a) as-synthesized KSW-2, (b) the product silylated with  $C_8C_1SiCl_2$ , and (c) the calcined product.

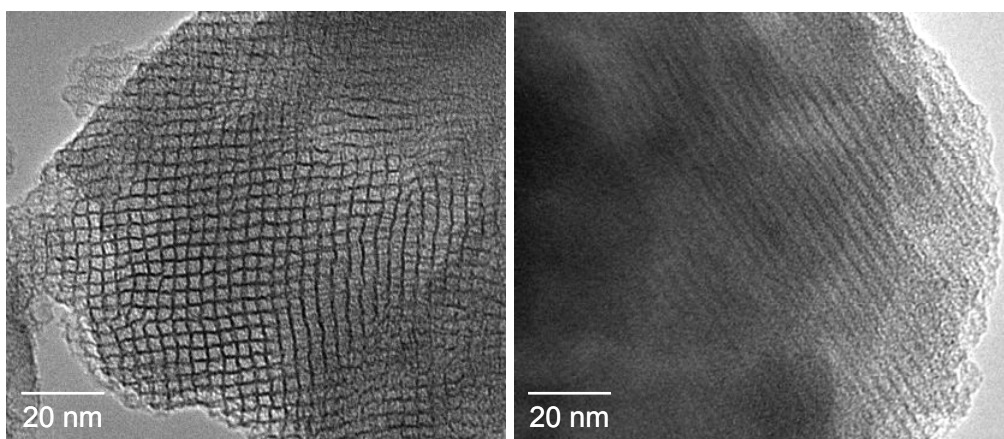

**Supporting Fig S2.** TEM images of as-synthesized KSW-2.

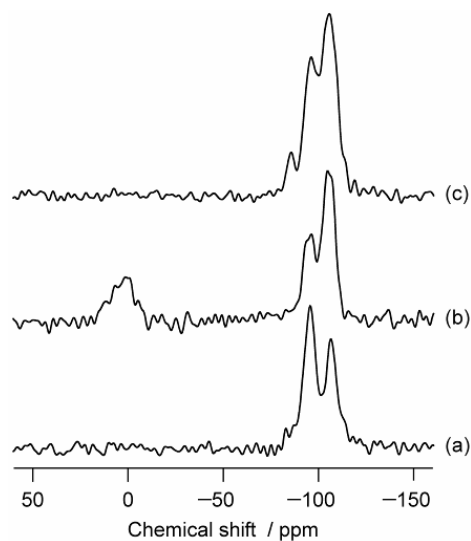

**Supporting Fig S3.**  $^{29}\text{Si}$  MAS NMR spectra of (a) as-synthesized KSW-2, (b) the product silylated with  $\text{C}_8\text{C}_1\text{SiCl}_2$ , and (c) the calcined product.

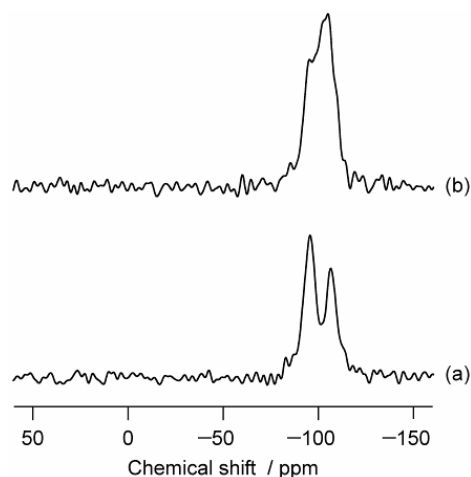

**Supporting Fig S4.**  $^{29}\text{Si}$  MAS NMR spectra of (a) as-synthesized KSW-2 and (b) the calcined product without silylation.

The  $^{13}\text{C}$  CP/MAS NMR spectra of as-synthesized KSW-2 and the silylated product are shown in Fig. S5. Only the peaks due to carbon atoms in attached organosilyl groups were observed without any peaks due to carbon atoms of  $\text{C}_{16}\text{TMA}$  ions after silylation. The result indicates that  $\text{C}_{16}\text{TMA}$  ions are eliminated during silylation, which is also supported by CHN analysis. Both nitrogen (2.1 mass %) and carbon atoms (35.0 mass %) due to  $\text{C}_{16}\text{TMA}$  ions (C/N ratio = 19.4) were detected in as-synthesized KSW-2, while nitrogen atoms were hardly detected after silylation (< 0.1 mass %). Therefore, all the carbon atoms (27.5 mass %) in the silylated product are considered to

come from octyl and methyl groups. The  $N_2$  adsorption-desorption isotherms of the calcined products of as-synthesized KSW-2 and the silylated product are shown in Fig. S6. Both of the isotherms showed type IV behaviors, as observed typically for ordered mesoporous silicas. The BET surface area ( $S_{BET}$ ), the pore volume ( $V_{total}$ ), and the pore diameter ( $4V_{0.8}/S$ ) of Si-KSW-2 (silylated and then calcined) were smaller than those of calcined KSW-2 (Table 1) because the silicate surfaces of square-shape mesopores were covered with new siloxane networks.

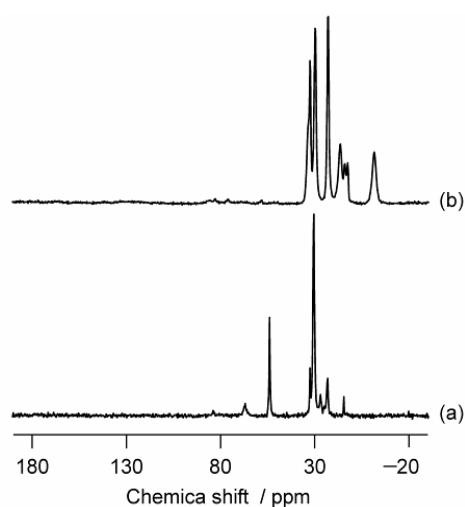

**Supporting Fig S5.**  $^{13}C$  CP/MAS NMR spectra of (a) as-synthesized KSW-2 and (b) the product silylated with  $C_8C_1SiCl_2$ .

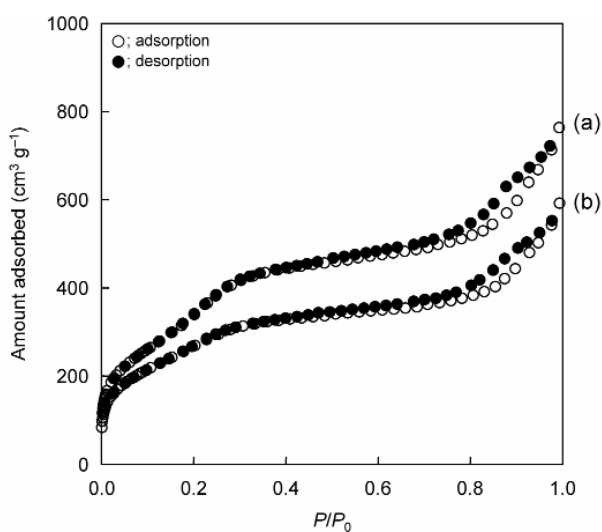

**Supporting Fig S6.**  $N_2$  adsorption-desorption isotherms of the calcined products of (a) as-synthesized KSW-2 and (b) the KSW-2 silylated with  $C_8C_1SiCl_2$ .

### Characterization of titanium grafted KSW-2-based mesoporous silica

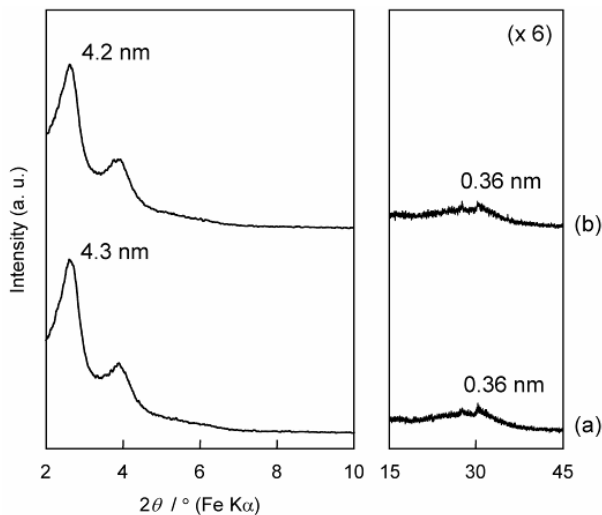

**Supporting Fig S7.** XRD patterns of the products silylated with  $\text{C}_8\text{C}_1\text{SiCl}_2$  in the presence of (a)  $\text{Cp}_2\text{TiCl}_2$  and (b)  $\text{CpTiCl}_3$  ( $\text{Si}/\text{Ti} = 250$ ).

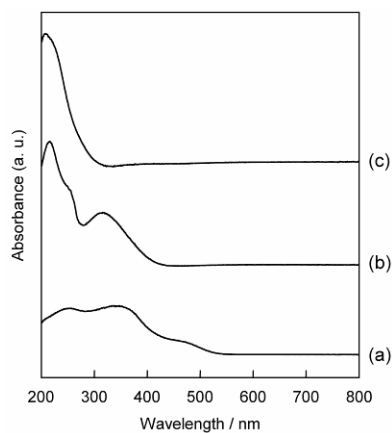

**Supporting Fig S8.** UV-Vis spectra of (a)  $\text{CpTiCl}_3$  diluted with  $\text{MgCO}_3$ , (b) the product silylated with  $\text{C}_8\text{C}_1\text{SiCl}_2$  in the presence of  $\text{CpTiCl}_3$  ( $\text{Si}/\text{Ti} = 250$ ), and (c) the calcined product.
